# Supplementary material for: Low-temperature mass production of superconducting MgB2 nanofibers from Mg(BH4)2 decomposition and recombination
Source: Royal Society of Chemistry journal article supplement (doi:10.1039/c0cc02745f), 2010-01-01
Supplement: c0cc02745f.pdf [file c0cc02745f.pdf]

## Electronic supplementary information (ESI)

# Low-temperature Massive Production of Superconducting MgB<sub>2</sub> Nanofibers from Mg(BH<sub>4</sub>)<sub>2</sub> decomposition and recombination

5 Junzhi Yang, Jie Zheng, Xuanzhou Zhang, Yaoqi Li, Rong Yang, Qingrong Feng\* and Xingguo Li\*

## Experimental Section

**General consideration.** Synthesis operations were carried out on the bench using Schlenk tube techniques in order to prevent productions from possible oxidation in air. The glassware  
10 was evacuated down to a pressure of 10 Pa and flushed with dry and oxygen-free nitrogen prior to use. Magnesium borohydride as precursor was put into a steel reactor and the system was then evacuated. The system was heated to desired temperature and maintained for 1h at 10<sup>-3</sup> Pa. Solids were handled in an argon-filled glove box which the water and oxygen concentrations were kept below 1 ppm during operation. Diethyl ether was distilled over sodium before use.  
15 Sodium borohydride and magnesium chloride (both 99%, Sigma Aldrich) were used as received.

**Synthesis of MgB<sub>2</sub> from Mg(BH<sub>4</sub>)<sub>2</sub> precursor.** The NaBH<sub>4</sub> mixed with MgCl<sub>2</sub> were mechanically milled for 10 h at 300 rpm under 5 bar hydrogen atmosphere by using a planetary ball milling apparatus (Pulverisette 5). The mole ratio of NaBH<sub>4</sub> and MgCl<sub>2</sub> was 2:1 and the  
20 weight ratio of ball-to-sample was around 20:1 in milling process. The milled fine white powder was transferred to a three-neck round bottom flask attached to a condenser. After the addition of diethyl ether, the suspension was vigorously stirred under refluxing for 12 h. The reaction mixture was filtered through a specially designed fine-grade round sintered discs for three times. The filtrate was vaporized and then dried under vacuum at 190 °C for 2 h. The  
25 yield was 90% with respect to Mg(BH<sub>4</sub>)<sub>2</sub>. This precursor was then put into a steel reactor and

heated under vacuum at 380 °C, 420 °C, 460 °C, and 500 °C for 1 h to form MgB<sub>2</sub>. The yield of the transformation is up to 95%.

**Characterization.** The structural analysis of the samples was carried out by X-ray diffraction using an automated Rigaku X-ray diffractometer with monochromatic Cu K $\alpha$  radiation. The differential scanning calorimetry was performed on a Netzsch DSC 204 HP calorimeter at a heating rate of 5 K/min under 2 bar argon from room temperature to 500 °C. The gas evolved was measured at 380 °C and a 0.8 bar hydrogen back-pressure using a PCT Pro-2000 Sievert's type pressure-composition-temperature apparatus from Hy-Energy to monitor the decomposition kinetics. Temperature and pressure of the sample and gas reservoirs were monitored by LabView-based control software. The size distribution and morphology of the samples were observed by field-emission scanning electron microscopy using a QUANTA 200 FEG at 10 kV. The magnetic properties of MgB<sub>2</sub> nanofibers, including *M-T* test and *M-H* test, were measured with the magnetic property measurement system (MPMS, Quantum Design).

## Figures

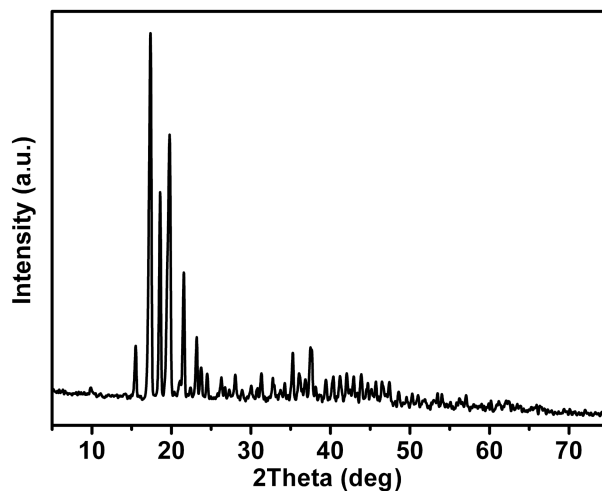

**Fig. S1.** XRD spectrum of the powder  $\text{Mg}(\text{BH}_4)_2$  obtained through milling  $\text{NaBH}_4$  and  $\text{MgCl}_2$  followed by refluxing in diethyl ether.

5

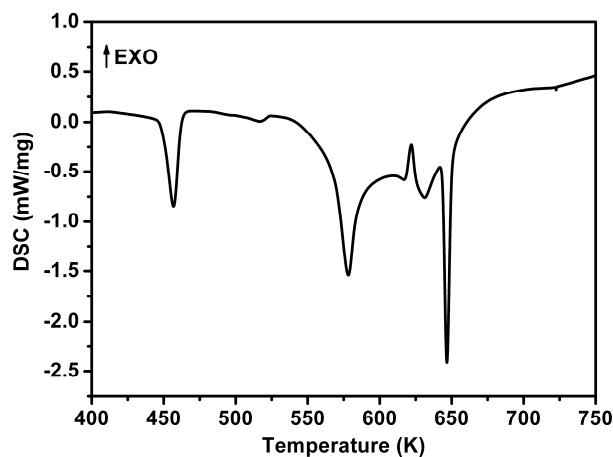

**Fig. S2.** DSC curve of  $\text{Mg}(\text{BH}_4)_2$  decomposition at a heating rate of 5 K/min under 2 bar argon.

10

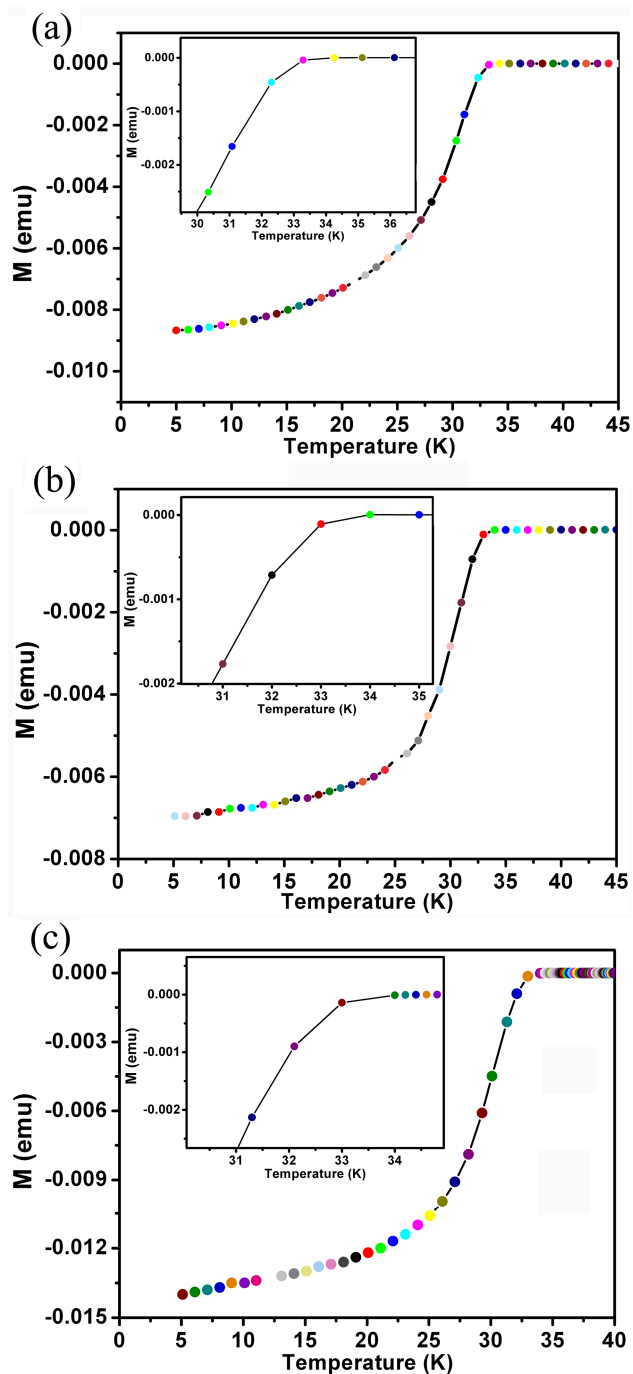

**Fig. S3.**  $M$ - $T$  curves of the MgB<sub>2</sub> nanofibers measured under a magnetic field of 50 Oe. Reaction condition: annealing at (a) 380 °C (b) 420 °C (c) 460 °C for 1 h.

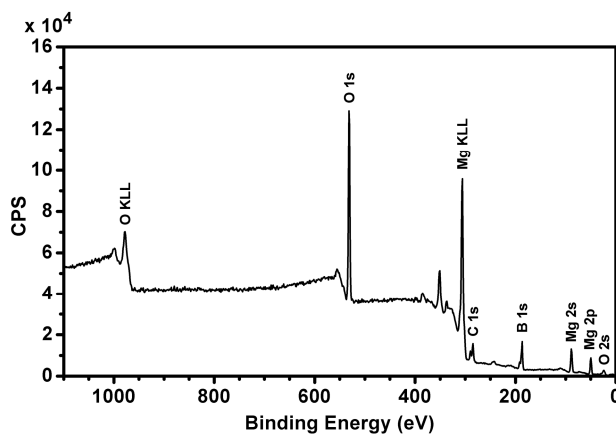

**Fig. S4.** XPS results of the superconducting  $\text{MgB}_2$  obtained from  $\text{Mg}(\text{BH}_4)_2$  decomposition and recombination

5

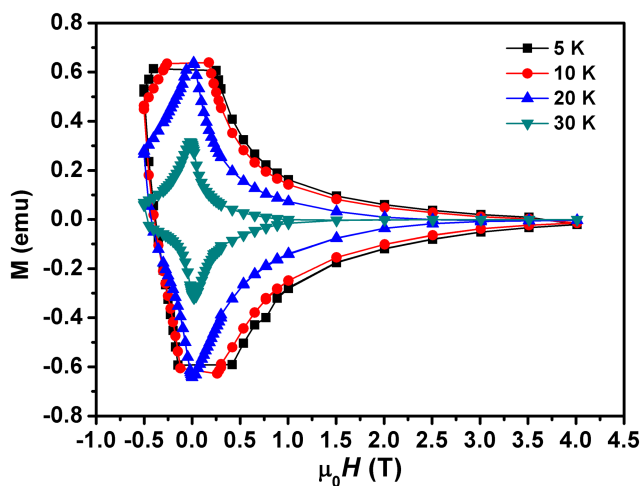

**Fig. S5.** The magnetization vs field plot for the  $\text{MgB}_2$  nanofibers processed at  $460\text{ }^\circ\text{C}$  for 1 h.
